# Supplementary material for: Pituitary Imaging Abnormalities and Related Endocrine Disorders in Erdheim–Chester Disease
Source: MDPI journal article supplement (doi:10.3390/cancers13164126), 2021-08-17
Supplement: s1 [file s1]

# Pituitary Imaging Abnormalities and Related Endocrine Disorders in Erdheim–Chester Disease

Skand Shekhar, Jorge A. Irizarry-Caro, Ninet Sinaii, William A. Gahl, Juvianee I. Estrada-Veras, Rahul H. Dave, Bernadette R. Gochuico, Georgios Z. Papadakis, Nicholas Patronas, Constantine A. Stratakis, Kevin O'Brien and Fady Hannah-Shmouni

**Supplement 1 (Table).** Hormone deficits, treatment and pituitary imaging characteristics of ECD cohort.

| ECD Serial No/ Sex | Age at NIH Visit | Age at Diagnosis of ECD | Endocrine Abnormalities                                      | Hypothalamic-Pituitary Lesion on MRI                                                                                                            | Treatment for ECD                               |
|--------------------|------------------|-------------------------|--------------------------------------------------------------|-------------------------------------------------------------------------------------------------------------------------------------------------|-------------------------------------------------|
| 1-M                | 46               | 43                      | Central hypogonadism, DI                                     | Small pituitary; narrowing of the pituitary stalk; loss of pituitary bright spot                                                                | Imatinib                                        |
| 2-M                | 42               | 42                      | Central AI, central hypogonadism, DI                         | Stalk deviation                                                                                                                                 | PEG-IFN, steroids                               |
| 3-F                | 32               | 32                      | None                                                         | Thickened pituitary stalk                                                                                                                       | PEG-IFN                                         |
| 4-M                | 64               | 54                      | Central hypogonadism                                         | Abnormal enhancement; pituitary encasement; possible cyst intermediate; absent posterior lobe                                                   | Anakinra                                        |
| 5-M                | 47               | 43                      | Central hypogonadism                                         | Partial empty sella                                                                                                                             | Interferon alfa                                 |
| 6-M                | 48               | 44                      | Central AI, central hypogonadism, central hypothyroidism, DI | Abnormal enhancement; absent posterior lobe; suprasellar mass causing lateral displacement of pituitary segments; loss of pituitary bright spot | Methotrexate, Remicade, Ionizing radiation      |
| 7-M                | 68               | 67                      | Central hypogonadism                                         | Small pituitary; thickened pituitary stalk; tapering of the infundibulum; partially empty sella; loss of pituitary bright spot                  | Interferon alfa                                 |
| 8-M                | 42               | 36                      | Central hypogonadism, central hypothyroidism, DI             | Enlarged pituitary stalk at hypothalamus; secondary empty sella with small pituitary; loss of pituitary bright spot                             | Anakinra, Interferon alfa                       |
| 9-M                | 50               | 46                      | Central hypogonadism, DI                                     | Thickened stalk at the base and right side of pituitary, invading the cavernous sinus; abnormal pituitary enhancement                           | Interferon alfa                                 |
| 10-M               | 64               | 63                      | None                                                         | None                                                                                                                                            | None                                            |
| 11-F               | 46               | 44                      | DI                                                           | None                                                                                                                                            | Cladribine                                      |
| 12-M               | 41               | 36                      | Central hypogonadism, DI                                     | None                                                                                                                                            | Dabrafenib, Trametinib, Interferon alfa         |
| 13-M               | 51               | 48                      | Central AI, central hypogonadism, central hypothyroidism, DI | Thickened stalk; pituitary encasement                                                                                                           | Dabrafenib, Trametinib                          |
| 14-M               | 64               | 57                      | DI                                                           | Loss of pituitary bright spot                                                                                                                   | Interferon alfa                                 |
| 15-M               | 51               | 46                      | None                                                         | Abnormal pituitary morphology; thickened pituitary stalk                                                                                        | Cladribine                                      |
| 16-M               | 57               | 58                      | Central AI                                                   | None                                                                                                                                            | Vemurafenib                                     |
| 17-M               | 61               | 59                      | None                                                         | None                                                                                                                                            | Imatinib, Dabrafenib, Trametinib                |
| 18-F               | 32               | 28                      | DI                                                           | Loss of pituitary bright spot                                                                                                                   | Ionizing radiation, Cladribine, Interferon alfa |
| 19-M               | 57               | 57                      | None                                                         | Loss of pituitary bright spot                                                                                                                   | None                                            |
| 20-F               | 19               | 17                      | None                                                         | Abnormal pituitary morphology; thickened pituitary stalk                                                                                        | PEG-IFN                                         |

|      |    |    |                                                                                  |                                                                                                                                                                  |                                         |
|------|----|----|----------------------------------------------------------------------------------|------------------------------------------------------------------------------------------------------------------------------------------------------------------|-----------------------------------------|
| 21-F | 64 | 64 | None                                                                             | Small pituitary                                                                                                                                                  | Cladribine                              |
| 22-F | 62 | 56 | Central hypothyroidism                                                           | Small pituitary; partially empty sella                                                                                                                           | Dabrafenib, Trametinib                  |
| 23-F | 50 | 50 | Central AI, central hypogonadism, hyperprolactinemia                             | Cyst intermediate                                                                                                                                                | 6-Mercaptopurine, Vincristine           |
| 24-M | 67 | 61 | None                                                                             | Small pituitary; partially empty sella                                                                                                                           | Anakinra                                |
| 25-F | 57 | 53 | None                                                                             | Cyst intermediate                                                                                                                                                | Cladribine                              |
| 26-M | 39 | 38 | Central AI, central hypogonadism, DI, hyperprolactinemia                         | Small pituitary; thickened pituitary stalk; loss of pituitary bright spot                                                                                        | Interferon alfa                         |
| 27-M | 34 | 33 | Central AI, central hypogonadism, central hypothyroidism, DI                     | Abnormal pituitary morphology-heterogenous enhancement; small pituitary; thickened pituitary stalk; stalk deviation; microadenoma; loss of pituitary bright spot | None                                    |
| 28-M | 51 | 51 | Central hypogonadism, hyperprolactinemia                                         | None                                                                                                                                                             | Interferon alfa                         |
| 29-M | 45 | 42 | None                                                                             | None                                                                                                                                                             | None                                    |
| 30-M | 50 | 49 | None                                                                             | None                                                                                                                                                             | PEG-IFN                                 |
| 31-F | 48 | 47 | Central hypogonadism, DI, hyperprolactinemia                                     | Cyst intermediate; suprasellar mass; loss of pituitary bright spot                                                                                               | Interferon alfa                         |
| 35-M | 45 | 44 | Central hypogonadism, DI                                                         | Heterogenous enhancement of pituitary gland; small pituitary; thickened pituitary stalk; partially empty sella; loss of pituitary bright spot                    | Vemurafenib                             |
| 36-M | 61 | 61 | Central hypogonadism                                                             | None                                                                                                                                                             | 6-Mercaptopurine, Steroids, Vinblastine |
| 37-M | 72 | 69 | DI                                                                               | None                                                                                                                                                             | Anakinra                                |
| 38-M | 54 | 52 | Central hypogonadism, DI                                                         | None                                                                                                                                                             | Interferon alfa, Dabrafenib, Trametinib |
| 39-M | 56 | 51 | None                                                                             | None                                                                                                                                                             | Vemurafenib                             |
| 40-M | 59 | 58 | Central hypogonadism                                                             | None                                                                                                                                                             | Vemurafenib                             |
| 41-M | 37 | 37 | None                                                                             | None                                                                                                                                                             | Anakinra                                |
| 42-M | 58 | 57 | Central hypogonadism, DI                                                         | None                                                                                                                                                             | Interferon alfa                         |
| 43-M | 55 | 51 | Central AI, central hypogonadism, DI                                             | Loss of pituitary bright spot                                                                                                                                    | Vemurafenib                             |
| 44-M | 68 | 65 | None                                                                             | None                                                                                                                                                             | Cyclophosphamide, Steroids              |
| 45-F | 30 | 28 | Central AI, central hypogonadism, central hypothyroidism, DI, hyperprolactinemia | Thickened pituitary stalk; pituitary gland enlarged abutting the optic chiasm; loss of pituitary bright spot                                                     | Cladribine                              |
| 46-M | 47 | 39 | Central AI                                                                       | Pituitary was symmetrical                                                                                                                                        | Remicade                                |
| 47-M | 44 | 34 | DI                                                                               | Loss of pituitary bright spot                                                                                                                                    | Interferon alfa, dabrafenib, trametinib |
| 48-M | 61 | 61 | Central AI, central hypogonadism                                                 | Abnormal configuration of the pituitary; thickened pituitary stalk; stalk deviation; pituitary encasement; partially empty sella; loss of pituitary bright spot  | Steroids                                |
| 49-M | 56 | 56 | Central AI, central hypogonadism                                                 | None                                                                                                                                                             | None                                    |

|             |    |    |                                                      |                                                                                       |                        |
|-------------|----|----|------------------------------------------------------|---------------------------------------------------------------------------------------|------------------------|
| <b>50-M</b> | 45 | 42 | Central hypogonadism, DI                             | Thickened pituitary stalk                                                             | Dasatinib              |
| <b>51-F</b> | 64 | 63 | None                                                 | Thickened pituitary stalk; stalk deviation; loss of pituitary bright spot             | Anakinra               |
| <b>52-F</b> | 48 | 48 | Central hypogonadism, hyperprolactinemia             | None                                                                                  | PEG-IFN                |
| <b>53-M</b> | 65 | 65 | Central hypogonadism, hyperprolactinemia             | Rathke's cyst                                                                         | None                   |
| <b>54-M</b> | 64 | 61 | Central hypogonadism, DI                             | Abnormal pituitary morphology-heterogenous enhancement; loss of pituitary bright spot | Vemurafenib            |
| <b>55-M</b> | 58 | 58 | Central hypogonadism, DI                             | Loss of pituitary bright spot                                                         | Interferon alfa        |
| <b>56-F</b> | 64 | 61 | None                                                 | None                                                                                  | Anakinra, Vemurafenib  |
| <b>57-M</b> | 50 | 46 | Central hypogonadism, DI                             | Thickened pituitary stalk; loss of pituitary bright spot                              | None                   |
| <b>58-M</b> | 52 | 52 | None                                                 | Stalk deviation                                                                       | Vemurafenib            |
| <b>59-F</b> | 58 | 58 | None                                                 | Thickened pituitary stalk; stalk deviation; loss of pituitary bright spot             | None                   |
| <b>60-F</b> | 57 | 47 | Central AI, hyperprolactinemia                       | None                                                                                  | Interferon alfa        |
| <b>64-M</b> | 69 | 68 | None                                                 | None                                                                                  | Methotrexate           |
| <b>67-M</b> | 47 | 47 | None                                                 | Thickened pituitary stalk; stalk deviation; loss of pituitary bright spot             | Dabrafenib, Trametinib |
| <b>68-M</b> | 74 | 74 | Central AI, central hypogonadism, hyperprolactinemia | Loss of pituitary bright spot                                                         | Steroids               |
| <b>71-M</b> | 46 | 45 | Central hypogonadism                                 | None                                                                                  | Dabrafenib, Trametinib |

AI, adrenal insufficiency; DI, diabetes insipidus; PEG-IFN, pegylated interferon.
